# Supplementary material
Source: publisher site journal article supplement (https://www.spandidos-publications.com/1686/downloadSupplementary)
Supplement: Supplementary file 1 [file downloadSupplementary]

Table SIX. List of 144 highly dysregulated mature miRNA in HTLV-1 ASM and ASP vs. HCs.

| Gene ID | P (Corr) | P | FC, ASM vs. HC | Log FC, ASM vs. HC | FC, abs, ASM vs. HC | Regulation, ASM Vs. HC | FC, ASP vs. HC | Log FC, ASP vs. HC | FC, abs, ASP vs. HC | Regulation, ASPvs. HC | Accession | Entrez ID | Ensembl ID | Gene Type | DB Refs |
| --- | --- | --- | --- | --- | --- | --- | --- | --- | --- | --- | --- | --- | --- | --- | --- |
| MI0000750_2 | 6.56x10-16 | 2.54x10-18 | 31.341,331 | 49.699,945 | 31.341,331 | Up | 31.320,435 | 49.690,323 | 31.320,435 | up | hsa-miR-26a-5p | 407016 | - | miRNA | miRBase:MI0000750 |
| MI0000079_1 | 2.61x10-14 | 2.02x10-16 | 40.316,544 | 53.333,000 | 40.316,544 | Up | 3.693,255 | 5.206,821 | 3.693,255 | up | hsa-miR-23a-3p | 407010 | ENSG00000207980 | miRNA | miRBase:MI0000079 |
| MI0000460_1 | 3.81x10-13 | 4.43x10-15 | -37.188,665 | -11.860,647 | 37.188,665 | Down | -27.190,608 | -11.408,893 | 27.190,608 | down | hsa-miR-144-3p | 406936 | ENSG00000264066 | miRNA | miRBase:MI0000460 |
| MI0000083_1 | 1.46x10-12 | 3.20x10-14 | 27.101,854 | 47.603,197 | 27.101,854 | Up | 24.256,586 | 46.003,046 | 24.256,586 | up | hsa-miR-26a-5p | 407015 | - | miRNA | miRBase:MI0000083 |
| MI0000086_1 | 1.46x10-12 | 3.97x10-14 | 14.419,387 | 3.849,938 | 14.419,387 | Up | 12.926,556 | 3.692,266 | 12.926,556 | up | hsa-miR-28-5p | 407020 | - | miRNA | miRBase:MI0000086 |
| MI0000439_2 | 1.46x10-12 | 3.64x10-14 | 76.034,355 | 62.485,795 | 76.034,355 | Up | 60.660,027 | 5.922,674 | 60.660,027 | up | hsa-miR-23b-3p | 407011 | - | miRNA | miRBase:MI0000439 |
| MI0000764_1 | 1.46x10-12 | 3.06x10-14 | -23.374,422 | -4.546,859 | 23.374,422 | Down | -2.615,667 | -4.709,107 | 2.615,667 | down | hsa-miR-363-3p | 574031 | ENSG00000207572 | miRNA | miRBase:MI0000764 |
| MI0003205_1 | 2.29x10-12 | 7.09x10-14 | -8.869,562 | -31.488,628 | 8.869,562 | Down | -8.537,428 | -30.938,015 | 8.537,428 | down | hsa-miR-532-5p | 693124 | - | miRNA | miRBase:MI0003205 |
| MI0000095_2 | 2.65x10-12 | 1.06x10-13 | -63.426,986 | -26.650,968 | 63.426,986 | Down | -6.639,082 | -27.309,837 | 6.639,082 | down | hsa-miR-93-5p | 407050 | - | miRNA | miRBase:MI0000095 |
| MI0000681_1 | 2.65x10-12 | 1.13x10-13 | 12.403,752 | 69.546,328 | 12.403,752 | Up | 7.215,362 | 6.173,000 | 7.215,362 | up | hsa-miR-155-5p | 406947 | ENSG00000234883 | miRNA | miRBase:MI0000681 |
| MI0000482_1 | 2.65x10-12 | 1.03x10-13 | -5.183,099 | -5.695,743 | 5.183,099 | Down | -36.544,243 | -5.191,572 | 36.544,243 | down | hsa-miR-185-5p | 406961 | ENSG00000208023 | miRNA | miRBase:MI0000482 |
| MI0000113_2 | 3.28x10-12 | 1.53x10-13 | -76.743,646 | -29.400,473 | 76.743,646 | Down | -7.908,217 | -29.833,524 | 7.908,217 | down | hsa-miR-106a-5p | 406899 | ENSG00000207602 | miRNA | miRBase:MI0000113|RFAM:RF00051 |
| MI0000298_1 | 3.93x10-12 | 1.98x10-13 | 8.074,902 | 30.134,447 | 8.074,902 | Up | 7.798,145 | 2.963,131 | 7.798,145 | up | hsa-miR-221-3p | 407006 | ENSG00000207870 | miRNA | miRBase:MI0000298 |
| MI0003762_1 | 1.05x10-11 | 6.72x10-13 | -39.585,995 | -5.306,918 | 39.585,995 | Down | -39.710,526 | -53.114,495 | 39.710,526 | down | hsa-miR-550a-3p | 100616354 | ENSG00000212024 | miRNA | miRBase:MI0003762 |
| MI0003600_2 | 1.05x10-11 | 6.95x10-13 | -39.516,838 | -53.043,957 | 39.516,838 | Down | -39.641,155 | -5.308,927 | 39.641,155 | down | hsa-miR-550a-3p | 693133 | - | miRNA | miRBase:MI0003600 |
| MI0003601_2 | 1.05x10-11 | 6.95x10-13 | -39.516,838 | -53.043,957 | 39.516,838 | Down | -39.641,155 | -5.308,927 | 39.641,155 | down | hsa-miR-550a-3p | 693134 | ENSG00000207573 | miRNA | miRBase:MI0003601 |
| MI0000066_1 | 1.05x10-11 | 6.72x10-13 | 10.067,761 | 3.331,671 | 10.067,761 | Up | 11.325,969 | 35.015,626 | 11.325,969 | up | hsa-let-7e-5p | 406887 | ENSG00000198972 | miRNA | miRBase:MI0000066|RFAM:RF00027 |
| MI0000734_1 | 1.85x10-11 | 1.29x10-12 | -7.779,753 | -29.597,244 | 7.779,753 | Down | -9.482,447 | -32.452,593 | 9.482,447 | down | hsa-miR-106b-3p | 406900 | - | miRNA | miRBase:MI0000734 |
| MI0000289_1 | 5.46x10-11 | 4.02x10-12 | 24.241,045 | 459,938 | 24.241,045 | Up | 206,123 | 43.654,337 | 206,123 | up | hsa-miR-181a-3p | 406995 | ENSG00000207759 | miRNA | miRBase:MI0000289 |
| MI0000282_1 | 5.95x10-11 | 4.61x10-12 | 20.965,572 | 43.899,503 | 20.965,572 | Up | 2.420,857 | 4.597,446 | 2.420,857 | up | hsa-miR-199b-3p | 406978 | ENSG00000207581 | miRNA | miRBase:MI0000282 |
| MI0000084_1 | 6.72x10-11 | 5.47x10-12 | 7.234,654 | 2.854,924 | 7.234,654 | Up | 61.758,857 | 2.626,646 | 61.758,857 | up | hsa-miR-26b-5p | 407017 | - | miRNA | miRBase:MI0000084 |
| MI0000286_1 | 6.73x10-11 | 5.88x10-12 | -37.118,366 | -52.140,613 | 37.118,366 | Down | -28.802,204 | -48.481,073 | 28.802,204 | down | hsa-miR-210-3p | 406992 | ENSG00000199038 | miRNA | miRBase:MI0000286 |
| MI0000479_2 | 6.73x10-11 | 6.00x10-12 | 2.381,381 | 78.956,547 | 2.381,381 | Up | 17.883,174 | 7.482,459 | 17.883,174 | up | hsa-miR-150-5p | 406942 | ENSG00000207782 | miRNA | miRBase:MI0000479 |
| MI0000281_1 | 7.21x10-11 | 6.71x10-12 | 2.129,345 | 4.412,338 | 2.129,345 | Up | 24.766,869 | 46.303,396 | 24.766,869 | up | hsa-miR-199a-3p | 406977 | ENSG00000208024 | miRNA | miRBase:MI0000281 |
| MI0000242_1 | 7.33x10-11 | 7.10x10-12 | 20.033,018 | 4.324,308 | 20.033,018 | Up | 23.329,348 | 4.544,074 | 23.329,348 | up | hsa-miR-199a-3p | 406976 | ENSG00000207752 | miRNA | miRBase:MI0000242 |
| MI0000273_2 | 7.74x10-11 | 7.80x10-12 | -37.394,205 | -8.546,671 | 37.394,205 | Down | -32.290,665 | -8.334,973 | 32.290,665 | down | hsa-miR-183-5p | 406959 | ENSG00000207691 | miRNA | miRBase:MI0000273 |
| MI0000077_1 | 9.95x10-11 | 1.04x10-11 | 7.359,278 | 28.795,643 | 7.359,278 | Up | 6.884,486 | 2.783,349 | 6.884,486 | up | hsa-miR-21-5p | 406991 | ENSG00000199004 | miRNA | miRBase:MI0000077 |
| MI0000082_1 | 1.37x10-10 | 1.48x10-11 | -51.010,714 | -23.508,003 | 51.010,714 | Down | -51.502,905 | -23.646,538 | 51.502,905 | down | hsa-miR-25-3p | 407014 | - | miRNA | miRBase:MI0000082 |
| MI0000234_2 | 3.91x10-10 | 4.39x10-11 | -20.857,792 | -43.825,145 | 20.857,792 | Down | -17.495,686 | -4.128,927 | 17.495,686 | down | hsa-miR-192-5p | 406967 | ENSG00000207648 | miRNA | miRBase:MI0000234 |
| MI0000805_2 | 8.43x10-10 | 9.81x10-11 | 15.189,004 | 39.249,554 | 15.189,004 | Up | 150,551 | 39.121,804 | 150,551 | up | hsa-miR-342-3p | 442909 | - | miRNA | miRBase:MI0000805 |
| MI0000734_2 | 1.02x10-9 | 1.23x10-10 | -8.808,144 | -3.138,838 | 8.808,144 | Down | -8.274,793 | -30.487,232 | 8.274,793 | down | hsa-miR-106b-5p | 406900 | - | miRNA | miRBase:MI0000734 |
| MI0000086_2 | 2.06x10-9 | 2.56x10-10 | 2.890,264 | 48.531,294 | 2.890,264 | Up | 2.030,081 | 43.434,653 | 2.030,081 | up | hsa-miR-28-3p | 407020 | - | miRNA | miRBase:MI0000086 |
| MI0000813_2 | 2.53x10-9 | 3.23x10-10 | -8.960,296 | -31.635,463 | 8.960,296 | Down | -10.991,199 | -34.582,767 | 10.991,199 | down | hsa-miR-324-5p | 442898 | ENSG00000199053 | miRNA | miRBase:MI0000813 |
| MI0000760_2 | 2.54x10-9 | 3.34x10-10 | 9.502,422 | 32.482,953 | 9.502,422 | Up | 77.384,033 | 2.952,036 | 77.384,033 | up | hsa-miR-361-5p | 494323 | - | miRNA | miRBase:MI0000760 |
| MI0000299_1 | 2.79x10-9 | 3.78x10-10 | 11.287,628 | 34.966,705 | 11.287,628 | Up | 106.984,415 | 34.193,287 | 106.984,415 | up | hsa-miR-222-3p | 407007 | ENSG00000207725 | miRNA | miRBase:MI0000299 |
| MI0000114_1 | 3.24x10-9 | 4.51x10-10 | -39.882,324 | -19.957,495 | 39.882,324 | Down | -3.995,886 | -19.985,155 | 3.995,886 | down | hsa-miR-107 | 406901 | - | miRNA | miRBase:MI0000114 |
| MI0017385_1 | 3.79x10-9 | 5.44x10-10 | -9.373,663 | -3.228,613 | 9.373,663 | Down | -11.838,956 | -356,547 | 11.838,956 | down | hsa-miR-4746-5p | 100616371 | ENSG00000266437 | miRNA | miRBase:MI0017385 |
| MI0001729_1 | 4.13x10-9 | 6.09x10-10 | -2.825,898 | -8.142,566 | 2.825,898 | Down | -19.512,134 | -76.082,277 | 19.512,134 | down | hsa-miR-451a | 574411 | ENSG00000264066 | miRNA | miRBase:MI0001729 |
| MI0000087_1 | 8.38x10-9 | 1.27x10-9 | 11.215,329 | 34,874 | 11.215,329 | Up | 11.857,489 | 35.677,266 | 11.857,489 | up | hsa-miR-29a-3p | 407021 | - | miRNA | miRBase:MI0000087|RFAM:RF00074 |
| MI0000486_1 | 1.09x10-8 | 1.69x10-9 | -1.285,198 | -7.005,847 | 1.285,198 | Down | -4.637,689 | -5.535,334 | 4.637,689 | down | hsa-miR-190a-5p | 406965 | - | miRNA | miRBase:MI0000486 |
| MI0000073_2 | 1.21x10-8 | 1.92x10-9 | -8.404,993 | -63.931,746 | 8.404,993 | Down | -6.130,942 | -5.938,037 | 6.130,942 | down | hsa-miR-19a-3p | 406979 | ENSG00000215417 | miRNA | miRBase:MI0000073 |
| MI0000782_2 | 1.23x10-8 | 2.00x10-9 | -11.864,264 | -35.685,506 | 11.864,264 | Down | -8.832,501 | -3.142,822 | 8.832,501 | down | hsa-miR-374a-5p | 442919 | ENSG00000199168 | miRNA | miRBase:MI0000782 |
| MI0000254_2 | 1.77x10-8 | 2.94x10-9 | 43.774,676 | 21.300,964 | 43.774,676 | Up | 4.465,003 | 21.586,611 | 4.465,003 | up | hsa-miR-30c-5p | 407032 | ENSG00000199094 | miRNA | miRBase:MI0000254 |
| MI0003600_1 | 2.36x10-8 | 4.12x10-9 | -15.863,623 | -39.876,504 | 15.863,623 | Down | -19.513,063 | -42.863,684 | 19.513,063 | down | hsa-miR-550a-5p | 693133 |  | miRNA | miRBase:MI0003600 |
| MI0003601_1 | 2.36x10-8 | 4.12x10-9 | -15.863,623 | -39.876,504 | 15.863,623 | Down | -19.513,063 | -42.863,684 | 19.513,063 | down | hsa-miR-550a-5p | 693134 | ENSG00000207573 | miRNA | miRBase:MI0003601 |
| MI0000683_1 | 2.89x10-8 | 5.16x10-9 | 8.971,098 | 31.652,846 | 8.971,098 | Up | 7.296,035 | 28.671,126 | 7.296,035 | up | hsa-miR-181b-5p | 406956 | ENSG00000207737 | miRNA | miRBase:MI0000683|RFAM:RF00076 |
| MI0000270_2 | 3.02x10-8 | 5.49x10-9 | 8.456,148 | 30.800,006 | 8.456,148 | Up | 6.750,944 | 27.550,893 | 6.750,944 | up | hsa-miR-181b-5p | 406955 | ENSG00000207975 | miRNA | miRBase:MI0000270|RFAM:RF00076 |
| MI0000804_1 | 3.39x10-8 | 6.30x10-9 | 33.386,946 | 17.392,842 | 33.386,946 | Up | 414,162 | 20.501,952 | 414,162 | up | hsa-miR-328-3p | 442901 | ENSG00000207948 | miRNA | miRBase:MI0000804 |
| MI0001519_2 | 3.42x10-8 | 6.50x10-9 | -8.531,548 | -30.928,075 | 8.531,548 | Down | -7.603,442 | -29.266,527 | 7.603,442 | down | hsa-miR-20b-5p | 574032 | ENSG00000207710 | miRNA | miRBase:MI0001519 |
| MI0000736_1 | 4.76x10-8 | 9.23x10-9 | 42.768,087 | 20.965,347 | 42.768,087 | Up | 42.320,237 | 20.813,477 | 42.320,237 | up | hsa-miR-30c-5p | 407031 | - | miRNA | miRBase:MI0000736 |
| MI0023622_1 | 8.56x10-8 | 1.69x10-8 | -11.059,106 | -34.671,628 | 11.059,106 | Down | -11.215,752 | -34.874,544 | 11.215,752 | down | hsa-miR-486-5p | - | - | miRNA | miRBase:MI0023622 |
| MI0000300_2 | 9.59x10-8 | 1.93x10-8 | 7.308,786 | 28.696,318 | 7.308,786 | Up | 11.365,794 | 35.066,266 | 11.365,794 | up | hsa-miR-223-3p | 407008 | ENSG00000207939 | miRNA | miRBase:MI0000300 |
| MI0002470_2 | 1.07x10-7 | 2.19x10-8 | -12.292,987 | -36.197,636 | 12.292,987 | Down | -12.431,914 | -36.359,766 | 12.431,914 | down | hsa-miR-486-5p | 619554 | - | miRNA | miRBase:MI0002470 |
| MI0000749_1 | 1.12x10-7 | 2.37x10-8 | -63.242,803 | -26.609,013 | 63.242,803 | Down | -53.180,532 | -24.108,982 | 53.180,532 | down | hsa-miR-30e-5p | 407034 | - | miRNA | miRBase:MI0000749 |
| MI0000749_2 | 1.12x10-7 | 2.43x10-8 | 4.093,194 | 2.033,227 | 4.093,194 | Up | 40.933,533 | 20.332,832 | 40.933,533 | up | hsa-miR-30e-3p | 407034 | - | miRNA | miRBase:MI0000749 |
| MI0003684_1 | 1.12x10-7 | 2.45x10-8 | -5.994,268 | -25.835,836 | 5.994,268 | Down | -5.803,471 | -2.536,916 | 5.803,471 | down | hsa-miR-660-5p | 724030 | - | miRNA | miRBase:MI0003684 |
| MI0000300_1 | 1.12x10-7 | 2.47x10-8 | 13.988,976 | 38.062,184 | 13.988,976 | Up | 9.950,762 | 3.314,807 | 9.950,762 | up | hsa-miR-223-5p | 407008 | ENSG00000207939 | miRNA | miRBase:MI0000300 |
| MI0000440_2 | 1.41x10-7 | 3.17x10-8 | 49.654,937 | 2.311,937 | 49.654,937 | Up | 50.926,795 | 2.348,425 | 50.926,795 | up | hsa-miR-27b-3p | 407019 | - | miRNA | miRBase:MI0000440 |
| MI0005559_1 | 1.50x10-7 | 3.44x10-8 | 7.105,232 | 28.288,817 | 7.105,232 | Up | 5.638,883 | 24.954,095 | 5.638,883 | up | hsa-miR-744-5p | 100126313 | - | miRNA | miRBase:MI0005559 |
| MI0000065_1 | 1.78x10-7 | 4.14x10-8 | 37.185,593 | 18.947,438 | 37.185,593 | Up | 33.009,346 | 17.228,745 | 33.009,346 | up | hsa-let-7d-5p | 406886 | ENSG00000199133 | miRNA | miRBase:MI0000065|RFAM:RF00027 |
| MI0000732_2 | 2.17x10-7 | 5.12x10-8 | -1.224,888 | -3.614,578 | 1.224,888 | Down | -12.549,716 | -36.495,829 | 12.549,716 | down | hsa-miR-194-5p | 406970 | ENSG00000229719 | miRNA | miRBase:MI0000732 |
| MI0000488_1 | 2.40x10-7 | 5.78x10-8 | -12.326,694 | -3.623,714 | 12.326,694 | Down | -12.445,709 | -36.375,766 | 12.445,709 | down | hsa-miR-194-5p | 406969 | ENSG00000207624 | miRNA | miRBase:MI0000488 |
| MI0000076_1 | 2.45x10-7 | 5.99x10-8 | -5.144,854 | -236,313 | 5.144,854 | Down | -38.671,858 | -1.951,284 | 38.671,858 | down | hsa-miR-20a-5p | 406982 | ENSG00000215417 | miRNA | miRBase:MI0000076 |
| MI0000449_1 | 2.93x10-7 | 7.27x10-8 | 10.295,872 | 33.639,941 | 10.295,872 | Up | 6.539,055 | 27.090,821 | 6.539,055 | up | hsa-miR-132-3p | 406921 | ENSG00000267200 | miRNA | miRBase:MI0000449 |
| MI0000263_2 | 3.26x10-7 | 8.36x10-8 | -9.255,353 | -6.532,216 | 9.255,353 | Down | -46.466,324 | -55.381,136 | 46.466,324 | down | hsa-miR-7-5p | 407043 | - | miRNA | miRBase:MI0000263|RFAM:RF00053 |
| MI0000071_2 | 3.26x10-7 | 8.59x10-8 | -8.654,363 | -31.134,276 | 8.654,363 | Down | -8.202,036 | -30.359,821 | 8.202,036 | down | hsa-miR-17-3p | 406952 | ENSG00000215417 | miRNA | miRBase:MI0000071|RFAM:RF00051 |
| MI0000264_1 | 3.26x10-7 | 8.49x10-8 | -8.825,218 | -646,356 | 8.825,218 | Down | -44.968,052 | -54.908,285 | 44.968,052 | down | hsa-miR-7-5p | 407044 | ENSG00000207703 | miRNA | miRBase:MI0000264|RFAM:RF00053 |
| MI0000265_1 | 3.26x10-7 | 8.34x10-8 | -8.755,235 | -6.452,074 | 8.755,235 | Down | -44.262,875 | -5.468,025 | 44.262,875 | down | hsa-miR-7-5p | 407045 | ENSG00000207630 | miRNA | miRBase:MI0000265|RFAM:RF00053 |
| MI0000272_2 | 3.27x10-7 | 8.73x10-8 | -12.926,583 | -3.692,269 | 12.926,583 | Down | -13.093,027 | -37.107,267 | 13.093,027 | down | hsa-miR-182-5p | 406958 | ENSG00000207990 | miRNA | miRBase:MI0000272 |
| MI0000298_2 | 3.36x10-7 | 9.25x10-8 | 561,361 | 24.889,288 | 561,361 | Up | 52.024,817 | 23.792,000 | 52.024,817 | up | hsa-miR-221-5p | 407006 | ENSG00000207870 | miRNA | miRBase:MI0000298 |
| MI0000075_1 | 3.36x10-7 | 9.25x10-8 | -22.277,393 | -44.775,085 | 22.277,393 | Down | -20.122,858 | -43.307,633 | 20.122,858 | down | hsa-miR-19b-3p | 406981 | ENSG00000207812 | miRNA | miRBase:MI0000075 |
| MI0000074_2 | 3.41x10-7 | 9.52x10-8 | -21.115,177 | -44.002,085 | 21.115,177 | Down | -1.925,777 | -4.267,369 | 1.925,777 | down | hsa-miR-19b-3p | 406980 | ENSG00000215417 | miRNA | miRBase:MI0000074 |
| MI0000072_1 | 4.14x10-7 | 1.17x10-7 | -15.231,885 | -39.290,226 | 15.231,885 | Down | -11.256,987 | -34.927,487 | 11.256,987 | down | hsa-miR-18a-5p | 406953 | - | miRNA | miRBase:MI0000072 |
| MI0000269_2 | 4.70x10-7 | 1.35x10-7 | 55.556,903 | 24.739,661 | 55.556,903 | Up | 65.151,668 | 2.703,802 | 65.151,668 | up | hsa-miR-181a-2-3p | 406954 | ENSG00000207595 | miRNA | miRBase:MI0000269|RFAM:RF00076 |
| MI0000072_2 | 4.70x10-7 | 1.37x10-7 | -49.384,127 | -23.040,473 | 49.384,127 | Down | -5.746,919 | -25.227,888 | 5.746,919 | down | hsa-miR-18a-3p | 406953 | - | miRNA | miRBase:MI0000072 |
| MI0005767_1 | 4.82x10-7 | 1.42x10-7 | -74.860,225 | -29.041,994 | 74.860,225 | Down | -10.538,831 | -33.976,429 | 10.538,831 | down | hsa-miR-942-5p | 100126331 | - | miRNA | miRBase:MI0005767 |
| MI0003186_2 | 4.94x10-7 | 1.47x10-7 | -4.094,716 | -20.337,634 | 4.094,716 | Down | -4.697,669 | -2.231,945 | 4.697,669 | down | hsa-miR-502-3p | 574504 | - | miRNA | miRBase:MI0003186 |
| MI0025242_1 | 5.92x10-7 | 1.79x10-7 | -5.598,615 | -248,507 | 5.598,615 | Down | -6.895,095 | -27.855,704 | 6.895,095 | down | hsa-miR-7706 | - | - | miRNA | miRBase:MI0025242 |
| MI0025240_1 | 6.21x10-7 | 1.90x10-7 | 10.301,255 | 33.647,482 | 10.301,255 | Up | 8.080,005 | 30.143,561 | 8.080,005 | up | hsa-miR-7704 | - | - | miRNA | miRBase:MI0025240 |
| MI0000239_2 | 8.12x10-7 | 2.52x10-7 | 4.912,148 | 2.296,354 | 4.912,148 | Up | 64.093,547 | 2.680,179 | 64.093,547 | up | hsa-miR-197-3p | 406974 | ENSG00000207709 | miRNA | miRBase:MI0000239 |
| MI0002468_1 | 8.31x10-7 | 2.61x10-7 | -7.091,322 | -28.260,546 | 7.091,322 | Down | -66.346,254 | -2.730,015 | 66.346,254 | down | hsa-miR-484 | 619553 | ENSG00000272213 | miRNA | miRBase:MI0002468 |
| MI0000281_2 | 9.23x10-7 | 2.97x10-7 | 75.841,713 | 29.229,915 | 75.841,713 | Up | 8.335,342 | 30.592,415 | 8.335,342 | up | hsa-miR-199a-5p | 406977 | ENSG00000208024 | miRNA | miRBase:MI0000281 |
| MI0000242_2 | 9.23x10-7 | 2.97x10-7 | 75.841,713 | 29.229,915 | 75.841,713 | Up | 8.335,342 | 30.592,415 | 8.335,342 | up | hsa-miR-199a-5p | 406976 | ENSG00000207752 | miRNA | miRBase:MI0000242 |
| MI0000065_2 | 1.09x10-6 | 3.53x10-7 | 4.125,328 | 2.044,509 | 4.125,328 | Up | 5.315,409 | 24.101,808 | 5.315,409 | up | hsa-let-7d-3p | 406886 | ENSG00000199133 | miRNA | miRBase:MI0000065|RFAM:RF00027 |
| MI0000483_2 | 1.35x10-6 | 4.46x10-7 | -34.872,706 | -18.020,983 | 34.872,706 | Down | -45.462,046 | -21.846,626 | 45.462,046 | down | hsa-miR-186-5p | 406962 | - | miRNA | miRBase:MI0000483 |
| MI0000760_1 | 1.37x10-6 | 4.56x10-7 | 5.348,114 | 24.190,302 | 5.348,114 | Up | 4.169,033 | 2.059,713 | 4.169,033 | up | hsa-miR-361-3p | 494323 | - | miRNA | miRBase:MI0000760 |
| MI0000090_2 | 1.41x10-6 | 4.77x10-7 | -21.744,574 | -44.425,836 | 21.744,574 | Down | -15.528,896 | -39.568,834 | 15.528,896 | down | hsa-miR-32-5p | 407036 | - | miRNA | miRBase:MI0000090 |
| MI0005566_2 | 1.54x10-6 | 5.24x10-7 | 45.001,316 | 21.699,672 | 45.001,316 | Up | 38.414,528 | 1.941,652 | 38.414,528 | up | hsa-miR-374b-5p | 100126317 | ENSG00000212027 | miRNA | miRBase:MI0005566 |
| MI0000825_1 | 1.66x10-6 | 5.73x10-7 | -4.346,748 | -21.199,365 | 4.346,748 | Down | -40.456,514 | -2.016,372 | 40.456,514 | down | hsa-miR-345-5p | 442910 | ENSG00000198984 | miRNA | miRBase:MI0000825 |
| MI0000291_2 | 1.74x10-6 | 6.07x10-7 | -11.661,867 | -3.543,727 | 11.661,867 | Down | -8.510,912 | -30.893,137 | 8.510,912 | down | hsa-miR-215-5p | 406997 | ENSG00000207590 | miRNA | miRBase:MI0000291 |
| MI0000060_1 | 1.90x10-6 | 6.70x10-7 | 40.984,406 | 20.350,752 | 40.984,406 | Up | 52.581,196 | 2.394,547 | 52.581,196 | up | hsa-let-7a-5p | 406881 | ENSG00000199165 | miRNA | miRBase:MI0000060|RFAM:RF00027 |
| MI0000061_2 | 2.47x10-6 | 8.80x10-7 | 36.721,492 | 18.766,247 | 36.721,492 | Up | 42.221,913 | 2.077,992 | 42.221,913 | up | hsa-let-7a-5p | 406882 | ENSG00000198975 | miRNA | miRBase:MI0000061|RFAM:RF00027 |
| MI0000062_1 | 2.51x10-6 | 9.03x10-7 | 4.088,712 | 20.316,465 | 4.088,712 | Up | 5.446,355 | 2.445,291 | 5.446,355 | up | hsa-let-7a-5p | 406883 | ENSG00000198986 | miRNA | miRBase:MI0000062|RFAM:RF00027 |
| MI0022688_2 | 2.98x10-6 | 1.10x10-6 | 4.718,837 | 22.384,312 | 4.718,837 | Up | 4.425,129 | 21.457,195 | 4.425,129 | up | hsa-miR-6842-3p | - | - | miRNA | miRBase:MI0022688 |
| MI0003834_1 | 2.98x10-6 | 1.09x10-6 | 37.120,042 | 18.921,983 | 37.120,042 | Up | 34.448,822 | 17.844,546 | 34.448,822 | up | hsa-miR-769-5p | 768217 | ENSG00000211580 | miRNA | miRBase:MI0003834 |
| MI0000739_1 | 3.30x10-6 | 1.23x10-6 | -7.786,734 | -29.610,183 | 7.786,734 | Down | -69.595,237 | -27.989,886 | 69.595,237 | down | hsa-miR-101-3p | 406894 | - | miRNA | miRBase:MI0000739 |
| MI0000103_1 | 3.52x10-6 | 1.32x10-6 | -73.098,297 | -28.698,378 | 73.098,297 | Down | -6.733,999 | -27.514,634 | 6.733,999 | down | hsa-miR-101-3p | 406893 | ENSG00000199135 | miRNA | miRBase:MI0000103 |
| MI0008191_1 | 3.70x10-6 | 1.41x10-6 | -48.392,577 | -22.747,858 | 48.392,577 | Down | -66.430,864 | -27.318,537 | 66.430,864 | down | hsa-miR-320c | 100302195 | ENSG00000212051 | miRNA | miRBase:MI0008191 |
| MI0000441_2 | 4.00x10-6 | 1.53x10-6 | 27.950,156 | 14.828,563 | 27.950,156 | Up | 2.911,937 | 15.419,792 | 2.911,937 | up | hsa-miR-30b-5p | 407030 | ENSG00000207582 | miRNA | miRBase:MI0000441 |
| MI0000802_1 | 4.01x10-6 | 1.55x10-6 | 64.644,604 | 269,253 | 64.644,604 | Up | 72.249,303 | 28.529,837 | 72.249,303 | up | hsa-miR-340-3p | 442908 | - | miRNA | miRBase:MI0000802 |
| MI0000462_1 | 4.12x10-6 | 1.61x10-6 | 7.192,955 | 28.465,846 | 7.192,955 | Up | 70.466,857 | 28.169,448 | 70.466,857 | up | hsa-miR-152-3p | 406943 | - | miRNA | miRBase:MI0000462 |
| MI0003778_1 | 4.20x10-6 | 1.66x10-6 | -52.938,023 | -24.043,043 | 52.938,023 | Down | -67.887,454 | -2.763,145 | 67.887,454 | down | hsa-miR-320c | 100302135 | ENSG00000221493 | miRNA | miRBase:MI0003778 |
| MI0000808_1 | 4.84x10-6 | 1.93x10-6 | 8.198,277 | 30.353,208 | 8.198,277 | Up | 11.527,072 | 35.269,542 | 11.527,072 | up | hsa-miR-326 | 442900 | - | miRNA | miRBase:MI0000808 |
| MI0006442_1 | 5.19x10-6 | 2.09x10-6 | 5.284,537 | 2.401,777 | 5.284,537 | Up | 56.004,353 | 2.485,539 | 56.004,353 | up | hsa-miR-664a-3p | 100302234 | - | miRNA | miRBase:MI0006442 |
| MI0016005_1 | 7.85x10-6 | 3.19x10-6 | -33.481,197 | -17.433,511 | 33.481,197 | Down | -426,957 | -20.940,907 | 426,957 | down | hsa-miR-3615 | 100500847 | ENSG00000264624 | miRNA | miRBase:MI0016005 |
| MI0000816_2 | 7.96x10-6 | 3.27x10-6 | 30.833,645 | 49.464,335 | 30.833,645 | Up | 36.472,084 | 51.887,207 | 36.472,084 | up | hsa-miR-335-3p | 442904 | - | miRNA | miRBase:MI0000816 |
| MI0000085_1 | 8.80x10-6 | 3.65x10-6 | 22.587,228 | 11.755,072 | 22.587,228 | Up | 25.587,928 | 13.554,634 | 25.587,928 | up | hsa-miR-27a-3p | 407018 | ENSG00000207808 | miRNA | miRBase:MI0000085 |
| MI0000069_2 | 9.11x10-6 | 3.82x10-6 | -42.130,466 | -2.074,864 | 42.130,466 | Down | -46.772,323 | -2.225,655 | 46.772,323 | down | hsa-miR-15a-5p | 406948 | ENSG00000231607 | miRNA | miRBase:MI0000069 |
| MI0006344_2 | 1.39x10-5 | 5.87x10-6 | -463,101 | -22.113,268 | 463,101 | Down | -39.229,488 | -19.719,385 | 39.229,488 | down | hsa-miR-548e-3p | 100313921 | - | miRNA | miRBase:MI0006344 |
| MI0014210_1 | 1.57x10-5 | 6.68x10-6 | -1.671,159 | -4.062,777 | 1.671,159 | Down | -9.595,119 | -32.623,007 | 9.595,119 | down | hsa-miR-3176 | 100423037 | - | miRNA | miRBase:MI0014210 |
| MI0003583_1 | 1.64x10-5 | 7.06x10-6 | -40.476,146 | -2.017,072 | 40.476,146 | Down | -4.305,901 | -21.063,151 | 4.305,901 | down | hsa-miR-576-5p | 693161 | - | miRNA | miRBase:MI0003583 |
| MI0015825_1 | 1.64x10-5 | 7.10x10-6 | -39.866,993 | -19.951,948 | 39.866,993 | Down | -3.386,936 | -17.599,807 | 3.386,936 | down | hsa-miR-378c | 100422867 | ENSG00000264803 | miRNA | miRBase:MI0015825 |
| MI0003676_2 | 2.24x10-5 | 9.81x10-6 | 32.640,358 | 5.028,585 | 32.640,358 | Up | 4.192,753 | 5.389,826 | 4.192,753 | up | hsa-miR-654-3p | 724024 | ENSG00000207934 | miRNA | miRBase:MI0003676 |
| MI0000469_1 | 2.53x10-5 | 1.12x10-5 | 66.604,815 | 27.356,265 | 66.604,815 | Up | 57.725,954 | 252,922 | 57.725,954 | up | hsa-miR-125a-5p | 406910 | ENSG00000208008 | miRNA | miRBase:MI0000469 |
| MI0000786_2 | 2.78x10-5 | 1.24x10-5 | 4.168,325 | 20.594,678 | 4.168,325 | Up | 2.831,606 | 15.016,205 | 2.831,606 | up | hsa-miR-378a-3p | 494327 | - | miRNA | miRBase:MI0000786 |
| MI0000460_2 | 3.28x10-5 | 1.48x10-5 | -7.438,958 | -28.951,006 | 7.438,958 | Down | -70.844,836 | -28.246,627 | 70.844,836 | down | hsa-miR-144-5p | 406936 | ENSG00000264066 | miRNA | miRBase:MI0000460 |
| MI0016003_2 | 3.71x10-5 | 1.68x10-5 | -77.355,896 | -62.734,394 | 77.355,896 | Down | -49.905,804 | -56.411,357 | 49.905,804 | down | hsa-miR-3613-5p | 100500908 | ENSG00000264864 | miRNA | miRBase:MI0016003 |
| MI0000433_1 | 3.87x10-5 | 1.78x10-5 | -72.654,757 | -28.610,573 | 72.654,757 | Down | -50.841,827 | -2.346,016 | 50.841,827 | down | hsa-let-7g-3p | 406890 | - | miRNA | miRBase:MI0000433 |
| MI0000465_2 | 4.73x10-5 | 2.20x10-5 | 31.912,096 | 16.741,034 | 31.912,096 | Up | 33.927,462 | 17.624,536 | 33.927,462 | up | hsa-miR-191-5p | 406966 | ENSG00000207605 | miRNA | miRBase:MI0000465 |
| MI0000472_2 | 5.12x10-5 | 2.40x10-5 | 1.933,349 | 42.730,303 | 1.933,349 | Up | 15.593,656 | 39.628,873 | 15.593,656 | up | hsa-miR-127-3p | 406914 | ENSG00000207608 | miRNA | miRBase:MI0000472 |
| MI0000782_1 | 5.36x10-5 | 2.53x10-5 | -6.441,147 | -26.873,176 | 6.441,147 | Down | -48.437,085 | -2.276,112 | 48.437,085 | down | hsa-miR-374a-3p | 442919 | ENSG00000199168 | miRNA | miRBase:MI0000782 |
| MI0000447_2 | 6.88x10-5 | 3.31x10-5 | 25.529,044 | 13.521,395 | 25.529,044 | Up | 2.499,071 | 13.213,918 | 2.499,071 | up | hsa-miR-128-3p | 406915 | - | miRNA | miRBase:MI0000447 |
| MI0000084_2 | 7.28x10-5 | 3.53x10-5 | 2.671,665 | 14.177,392 | 2.671,665 | Up | 24.174,316 | 1.273,475 | 24.174,316 | up | hsa-miR-26b-3p | 407017 | - | miRNA | miRBase:MI0000084 |
| MI0017308_2 | 7.65x10-5 | 3.74x10-5 | -25.948,339 | -13.756,422 | 25.948,339 | Down | -3.184,383 | -16.710,138 | 3.184,383 | down | hsa-miR-4677-3p | 100616343 | - | miRNA | miRBase:MI0017308 |
| MI0006444_2 | 8.16x10-5 | 4.02x10-5 | -7.274,834 | -28.629,143 | 7.274,834 | Down | -53.586,044 | -24.218,574 | 53.586,044 | down | hsa-miR-1307-5p | 100302174 | ENSG00000221767 | miRNA | miRBase:MI0006444 |
| MI0003675_1 | 1.05x10-4 | 5.20x10-5 | 18.792,887 | 4.232,115 | 18.792,887 | Up | 18.864,815 | 4.237,626 | 18.864,815 | up | hsa-miR-411-5p | 693121 | ENSG00000199109 | miRNA | miRBase:MI0003675 |
| MI0003643_2 | 1.08x10-4 | 5.40x10-5 | -468,119 | -22.268,753 | 468,119 | Down | -33.747,141 | -17.547,653 | 33.747,141 | down | hsa-miR-629-5p | 693214 | - | miRNA | miRBase:MI0003643 |
| MI0005561_1 | 1.15x10-4 | 5.79x10-5 | 4.706,857 | 2.234,764 | 4.706,857 | Up | 24.739,282 | 13.068,037 | 24.739,282 | up | hsa-miR-877-5p | 100126314 | - | miRNA | miRBase:MI0005561 |
| MI0003666_1 | 1.26x10-4 | 6.39x10-5 | -4.385,084 | -21.326,046 | 4.385,084 | Down | -30.136,356 | -1.591,505 | 30.136,356 | down | hsa-miR-651-5p | 723779 | ENSG00000207628 | miRNA | miRBase:MI0003666 |
| MI0000762_1 | 1.34x10-4 | 6.84x10-5 | -5.189,739 | -2.375,662 | 5.189,739 | Down | -57.615,304 | -2.526,452 | 57.615,304 | down | hsa-miR-362-5p | 574030 | - | miRNA | miRBase:MI0000762 |
| MI0000477_1 | 1.59x10-4 | 8.18x10-5 | 39.976,013 | 19.991,345 | 39.976,013 | Up | 3.783,151 | 19.195,883 | 3.783,151 | up | hsa-miR-146a-5p | 406938 | ENSG00000253522 | miRNA | miRBase:MI0000477 |
| MI0001446_2 | 2.08x10-4 | 1.08x10-4 | -76.301,084 | -29.317,036 | 76.301,084 | Down | -703,666 | -28.148,909 | 703,666 | down | hsa-miR-424-5p | 494336 | ENSG00000223749 | miRNA | miRBase:MI0001446 |
| MI0000816_1 | 2.43x10-4 | 1.27x10-4 | 326,893 | 17.088,184 | 326,893 | Up | 43.206,577 | 21.112,509 | 43.206,577 | up | hsa-miR-335-5p | 442904 | - | miRNA | miRBase:MI0000816 |
| MI0003129_1 | 2.44x10-4 | 1.29x10-4 | 2.804,904 | 14.879,514 | 2.804,904 | Up | 40.974,245 | 20.347,173 | 40.974,245 | up | hsa-miR-146b-5p | 574447 | ENSG00000202569 | miRNA | miRBase:MI0003129 |
| MI0000100_2 | 2.45x10-4 | 1.30x10-4 | 3.040,872 | 16.044,852 | 3.040,872 | Up | 37.014,387 | 18.880,861 | 37.014,387 | up | hsa-miR-98-5p | 407054 | - | miRNA | miRBase:MI0000100|RFAM:RF00027 |
| MI0001445_2 | 2.62x10-4 | 1.40x10-4 | 2.993,248 | 15.817,118 | 2.993,248 | Up | 32.792,435 | 1.713,363 | 32.792,435 | up | hsa-miR-423-3p | 494335 | - | miRNA | miRBase:MI0001445 |
| MI0003184_1 | 2.88x10-4 | 1.55x10-4 | -40.416,293 | -2.014,937 | 40.416,293 | Down | -38.058,138 | -1.928,205 | 38.058,138 | down | hsa-miR-500a-5p | 574502 | - | miRNA | miRBase:MI0003184 |
| MI0000735_2 | 3.17x10-4 | 1.73x10-4 | -29.861,357 | -15.782,797 | 29.861,357 | Down | -30.572,584 | -16.122,385 | 30.572,584 | down | hsa-miR-29c-5p | 407026 | ENSG00000207966 | miRNA | miRBase:MI0000735 |
| MI0005531_2 | 4.56x10-4 | 2.53x10-4 | -849,597 | -30.867,786 | 849,597 | Down | -36.301,148 | -18.600,152 | 36.301,148 | down | hsa-miR-450b-5p | 100126302 | ENSG00000216001 | miRNA | miRBase:MI0005531 |
| MI0016746_2 | 4.60x10-4 | 2.57x10-4 | -21.531,482 | -11.064,476 | 21.531,482 | Down | -25.247,502 | -13.361,406 | 25.247,502 | down | hsa-miR-548o-3p | 100616190 | - | miRNA | miRBase:MI0016746 |
| MI0003642_1 | 5.04x10-4 | 2.83x10-4 | 11.567,553 | 35.320,117 | 11.567,553 | Up | 6.410,556 | 26.804,495 | 6.410,556 | up | hsa-miR-628-3p | 693213 | - | miRNA | miRBase:MI0003642 |
| MI0000746_1 | 6.85x10-4 | 3.88x10-4 | 41.733,193 | 20.611,954 | 41.733,193 | Up | 40.774,198 | 20.276,566 | 40.774,198 | up | hsa-miR-99b-5p | 407056 | ENSG00000207550 | miRNA | miRBase:MI0000746 |
| MI0006402_1 | 7.04x10-4 | 4.01x10-4 | -20.878,022 | -1.061,985 | 20.878,022 | Down | -24.267,995 | -12.790,549 | 24.267,995 | down | hsa-miR-548o-3p | 100313829 | ENSG00000221510 | miRNA | miRBase:MI0006402 |
| MI0003139_1 | 9.08x10-4 | 5.21x10-4 | 23.672,347 | 12.432,027 | 23.672,347 | Up | 21.017,766 | 10.716,093 | 21.017,766 | up | hsa-miR-181d-5p | 574457 | ENSG00000207585 | miRNA | miRBase:MI0003139 |

HTLV-1, Human T-lymphotropic virus type I; ASM, asymptomatic carriers with monoclonal T cell receptor γ gene rearrangement; ASP, asymptomatic carriers with polyclonal T cell receptor γ gene rearrangement; HCs, healthy controls; P (Corr), Corrected P-value; P, P-value; FC, Fold Change; miRNA, microRNA; trna, transfer RNA; SNORD, small nucleolar RNA C/D box; TRNAE40P, transfer RNA glutamic acid 40 (anticodon UUC) pseudogene; sRNAs, small RNAs; scRNA, small conditional RNA; hsa, Homo sapiens
